# Supplementary material for: Конспект урока «замечательное вещество – вода»
Source: Royal Society of Chemistry journal article supplement (doi:10.1039/c003377d), 2011-01-01
Supplement: c003377d.pdf [file c003377d.pdf]

**Electronic Supplementary Information**

**Oxalic acid photooxidation on rutile nanowire electrodes**

Thomas Berger<sup>1,2</sup>, Antonio Rodes<sup>1</sup>, and Roberto Gómez<sup>1,\*</sup>

*<sup>1</sup>Departament de Química Física i Institut Universitari d'Electroquímica, Universitat d'Alacant,  
Apartat 99, E-03080 Alacant, Spain*

*<sup>2</sup>Departamento de Sistemas Físicos, Químicos y Naturales, Área de Química Física, Universidad  
Pablo de Olavide, Ctra. Utrera, km 1, E-41013 Sevilla, Spain*

\*Corresponding author. E-mail: Roberto.Gomez@ua.es.

Fax: +34 965903537. Tel. +34 965903748

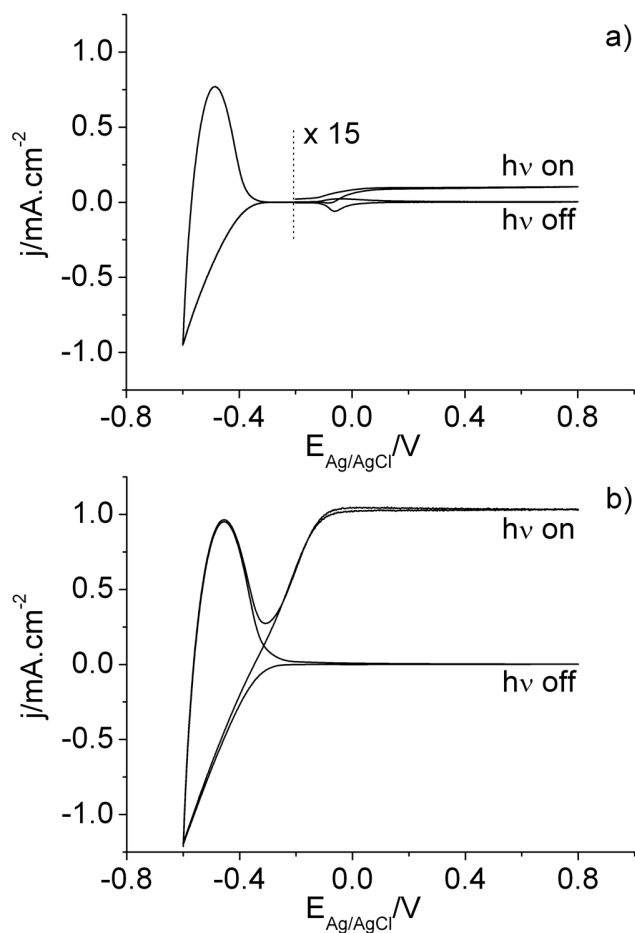

**Figure S1.** Voltammograms of a NW-TiO<sub>2</sub>@FTO electrode in a 100 mM HClO<sub>4</sub> aqueous solution (a) and in a 50 mM H<sub>2</sub>C<sub>2</sub>O<sub>4</sub> + 100 mM HClO<sub>4</sub> aqueous solution (b) in the dark and during UV/Vis exposure. Polychromatic EE illumination; 300 W Xe lamp;  $I(E < 6.2 \text{ eV}) = 500 \text{ mW}\cdot\text{cm}^{-2}$ ; scan rate:  $20 \text{ mV}\cdot\text{s}^{-1}$ ; film thickness:  $d(\text{TiO}_2) = 360 \text{ nm}$ .

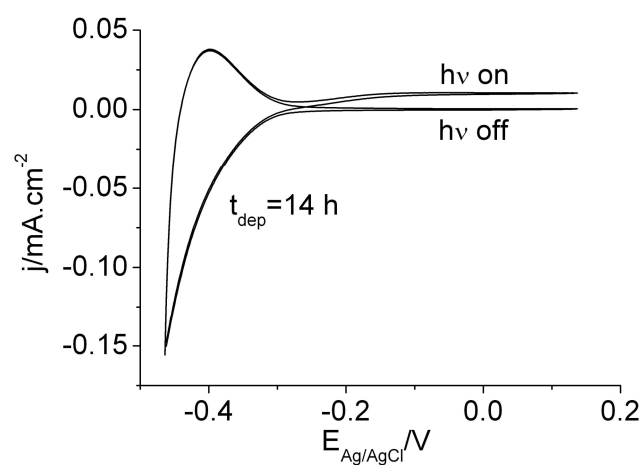

**Figure S2.** Voltammograms of a NW-TiO<sub>2</sub>@Au@Si thin film (oxide deposition time: 14 h) in 10 mM H<sub>2</sub>C<sub>2</sub>O<sub>4</sub> + 100 mM HClO<sub>4</sub> aqueous solution in the dark and during UV/Vis exposure; polychromatic EE illumination; 50 W medium-pressure Hg lamp,  $I = 10 \text{ mW}\cdot\text{cm}^{-2}$ ; scan rate:  $20 \text{ mV}\cdot\text{s}^{-1}$ .
